# Supplementary material for: Reactivity of nitrogen atoms from Zif-8 structure deposited over Ti3C2 MXene in the electrochemical nitrogen reduction reaction
Source: Royal Society of Chemistry journal article supplement (doi:10.1039/d3cc02693k), 2023-01-01
Supplement: d3cc02693k1.pdf [file d3cc02693k1.pdf]

**Supporting information**

Reactivity of Nitrogen Atoms from Zif-8 Structure  
Deposited over  $\text{Ti}_3\text{C}_2$  MXene in the Electrochemical  
Nitrogen Reduction Reaction

*André L. A. Marinho\**, *Clément Comminges*, *Aurélien Habrioux*, *Stéphane Célérier*, *Nicolas Bion*, *Cláudia Morais*

Institut de Chimie des Milieux et Matériaux de Poitiers (IC2MP), University of Poitiers, CNRS  
UMR 7285, TSA51106 – F86073, Poitiers Cedex 9, France

**Corresponding Author**

\* E-mail address: [andre.luiz.marinho@univ-poitiers.fr](mailto:andre.luiz.marinho@univ-poitiers.fr) (André L. A. Marinho)

## Experimental Section

### Synthesis of $\text{Ti}_3\text{C}_2$ MXene

The  $\text{Ti}_3\text{C}_2$  catalyst was synthesized by  $\text{Ti}_3\text{AlC}_2$  MAX phase etching. The MAX phase synthesis was previously reported by the group<sup>1</sup>. In a typical synthesis procedure, 0.5 g of  $\text{Ti}_3\text{AlC}_2$  MAX phase was slowly added into a plastic tube containing 10 mL of 0.8 g LiF dissolved in 9 mol.L<sup>-1</sup> HCl. Therefore, the initial F/Al atomic ratio is 12. The reaction was performed for 72h at 60 °C under stirring.

The suspension obtained after the etching step is centrifuged 4 times at 6000 rpm for 6 min with ultrapure water to eliminate the excess of acid. At this point the supernatant must have pH  $\geq$  5. The sediment is redispersed in 5 mL of water following by vacuum-assisted filtration (PVDF membrane, 0.22  $\mu\text{m}$  pore size), washed with ultrapure water and dried overnight under air at ambient temperature.

A final step is performed to eliminate Al impurities by dispersing the obtained MXenes in 350 mL of ultrapure water previously degassed with Ar and stirred during 4h under Ar atmosphere. Then, the suspension is filtered and dried overnight at ambient conditions. Finally, the obtained film is stored under Ar atmosphere to avoid possible oxidation by air.

### Synthesis of Zif-8@ $\text{Ti}_3\text{C}_2$ MXene

60 mg of  $\text{Ti}_3\text{C}_2$  is added to 20 mL of methanol, followed by 15 min under ultrasound. Then, 219 mg of zinc acetate (1 mmol) is added into the beaker and dispersed using ultrasonication during 1h. In another beaker, 328 mg (4 mmol) of 2-methylimidazole is dissolved in 20 mL of methanol and both solutions are mixed. The mixture is stirred for 4h at room temperature to synthesize the Zif-8 structure. Finally, the solution is centrifuged 4 times with methanol at 9000 rpm for 10 min,

following by vacuum-assisted filtration (PVDF membrane, 0.22  $\mu\text{m}$  pore size) and dried overnight under air at ambient temperature.

### **Characterization:**

X-ray diffraction (XRD) of the samples was performed with a PANalytical EMPYREAN powder diffractometer using  $\text{CuK}\alpha$  radiation source ( $K_{\alpha 1} = 1.5406 \text{ \AA}$  and  $K_{\alpha 2} = 1.5444 \text{ \AA}$ ). The diffractograms were collected between 3 and 70° with a 0.07° step and 420 s dwell time at each step. An ultra-fast X-Ray detector (X'Celerator) was used to collect the signals. The phase identification is based on the previous work<sup>1</sup>.

The Raman spectroscopy was performed using a HORIBA Jobin Yvon LabRAM HR800 confocal Raman microscope with a CCD detector. The spectra were obtained at room temperature using an excitation wavelength of 532 nm. A limit of 1 mW of power was carefully delivered to the sample. The spectral resolution is 0.5  $\text{cm}^{-1}$ .

The MXene morphology was evaluated by field emission gun scanning electron microscope (FEG-SEM) 7900F from JEOL. The microscope is equipped with an Energy Dispersive X-ray Spectrometer (EDS) from Brücker to analyze the presence of Zn and Ti from Zif-8 and MXene structures, respectively.

### **Electrochemical NRR measurements:**

All electrochemical tests were performed at room temperature using a potentiostat Autolab (PGSTAT-302N). For the ink preparation, 7 mg of catalyst is dispersed in a mixture of Mili-Q  $\text{H}_2\text{O}$  (250  $\mu\text{L}$ , 18.2  $\text{M}\Omega\cdot\text{cm}$ ), isopropanol (250  $\mu\text{L}$ ) and Nafion® (20  $\mu\text{L}$ ) by sonicating for 20 minutes to form a homogeneous ink.

The Linear Sweep Voltammetry tests (LSV) were performed in a standard three-electrode electrochemical cell coupled with a rotating disc electrode (5 mm) as working electrode. A saturated calomel and a glassy carbon plate were used as reference and counter electrodes, respectively. The catalyst ink was deposited onto the glassy carbon rotating electrode (7  $\mu\text{L}$ , 0.5  $\text{mg}\cdot\text{cm}^{-2}$ ). The measurements were conducted in a  $\text{N}_2$  and Ar-saturated 0.1 M NaOH electrolyte (99.7 %, VWR) between 0.1 to -0.6 vs RHE at a scan rate of 10  $\text{mV}\cdot\text{s}^{-1}$  applying a rotating rate of 1600 rpm to the working electrode. The electrochemical double-layer capacitance (Cdl) has been measured through cyclic voltammograms (CVs) in non-faradaic potential regions and are extracted by the linearization of  $\Delta J = j_A - j_C$  vs. scan rate (Figure S4).

The chronoamperometry analysis was performed to produce  $\text{NH}_3$  for quantification and it was performed in the same three-electrode electrochemical cell. A saturated calomel and carbon glassy plate were used as reference and counter electrodes. For the working electrode, it was used a carbon paper (1  $\text{cm}^2$ ), where it was deposited 74.2  $\mu\text{L}$  of catalyst ink (1  $\text{mg}\cdot\text{cm}^{-2}$ ). Just before the entrance of the cell, two vials were connected containing  $\text{KMnO}_4$  and  $\text{H}_2\text{SO}_4$  solutions each one to eliminate any  $\text{NH}_3$  or  $\text{NO}_x$  contamination in the high-purity gas. The same reaction was performed in an H-cell type obtaining similar results of  $\text{NH}_3$  production, indicating that the  $\text{NH}_3$  produced in the reaction is not oxidized in the anode.

The reaction was performed at different controlled potentials in  $\text{N}_2$  and Ar-saturated 0.1 M NaOH and at open-circuit potential in  $\text{N}_2$ -saturated electrolyte for 2 h ( $\text{N}_2$  and Ar purity of 99.9999 %). It was used 25 mL of electrolyte in the cell. The electrochemical cell was degassed for 1 h before the experiment with the gas bubbling into the electrolyte and the gas was constantly bubbled into the electrolyte during all the reaction. To rule out the quantification of  $\text{NH}_3$  from air ambient, the

electrochemical cell was maintained isolated from air under gas circulation and no experiences with ammonia solution was performed in the same laboratory.

### **NH<sub>3</sub> quantification:**

The amount of NH<sub>3</sub> produced during the reaction was determined by the Indophenol method. Typically, 1.5 mL of electrolyte was immediately taken after the reaction and added to a plastic tube. Then, 100 μL of phenol solution is added (0.5 mol L<sup>-1</sup>) followed by 50 μL of Na<sub>2</sub>[Fe(CN)<sub>5</sub>NO] (0.002 mol L<sup>-1</sup>) and 100 μL of NaClO alkaline solution (0.7 mol L<sup>-1</sup> dissolved in 1 mol L<sup>-1</sup> NaOH). The solution is maintained in the dark for 2 h and the concentration is obtained by measuring the absorption peak at 655 nm by UV-VIS spectrometer (Thermo Helios Omega). The fresh 0.1 M NaOH electrolyte was also evaluated to create a background absorption peak and eliminate the influence of NH<sub>3</sub> in the air. The calibration curve was performed with different NH<sub>4</sub>Cl concentrations in 0.1 M NaOH solution (Figure S8).

The NH<sub>3</sub> formation rate the faradaic efficiency were calculated as described below:

$$\text{NH}_3 \text{ rate of formation} = (C_{\text{NH}_3} \times V) / (t \times m_{\text{cat}}) \quad (1)$$

$$\text{Faradaic efficiency} = (3 \times F \times C_{\text{NH}_3} \times V) / (17 \times Q) \quad (2)$$

Where, C<sub>NH<sub>3</sub></sub> is the NH<sub>3</sub> concentration calculated (ppm), F is the Faraday constant (96487 C.mol<sup>-1</sup>), t is the electrolysis time, m<sub>cat</sub> is the mass of catalysts, V is the volume of electrolyte and Q is the amount of charge consumed during the reaction.

### **Hydrazine quantification:**

The possible production of hydrazine was evaluated by the spectrophotometric Watt-Chrisp method<sup>2</sup>. Previously, a color reagent was prepared with a mixture of 100 mL ethanol, 2.0 g of

para(dimethylamino)benzaldehyde and 12 mL of HCl (37 wt%). Typically, 2 mL of electrolyte was immediately taken and reacted with 2 mL of color reagent during 30 min. After that, the absorbance is measured at 458 nm.

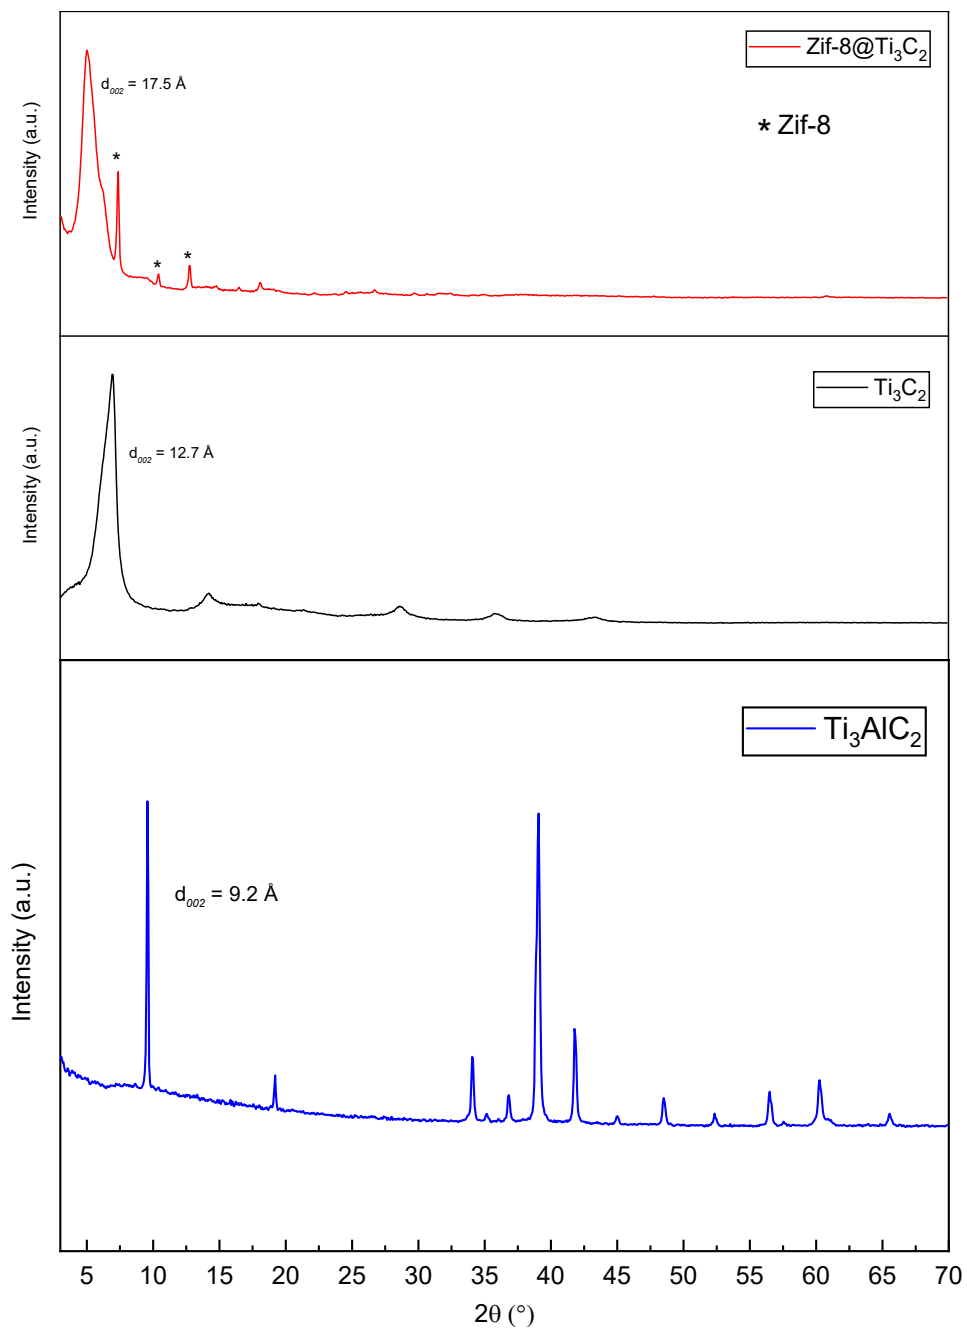

**Figure S1.** XRD results of the MAX phase and MXene-based catalysts.

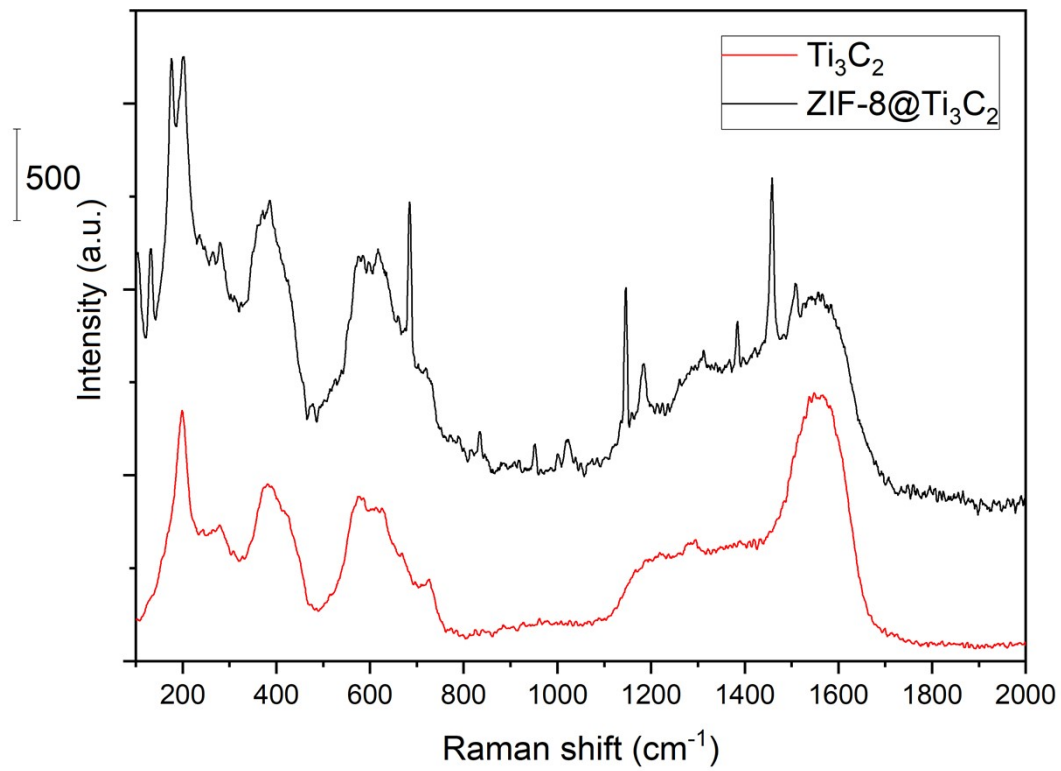

**Figure S2.** Raman spectra of Ti<sub>3</sub>C<sub>2</sub> and Zif-8@Ti<sub>3</sub>C<sub>2</sub> materials.



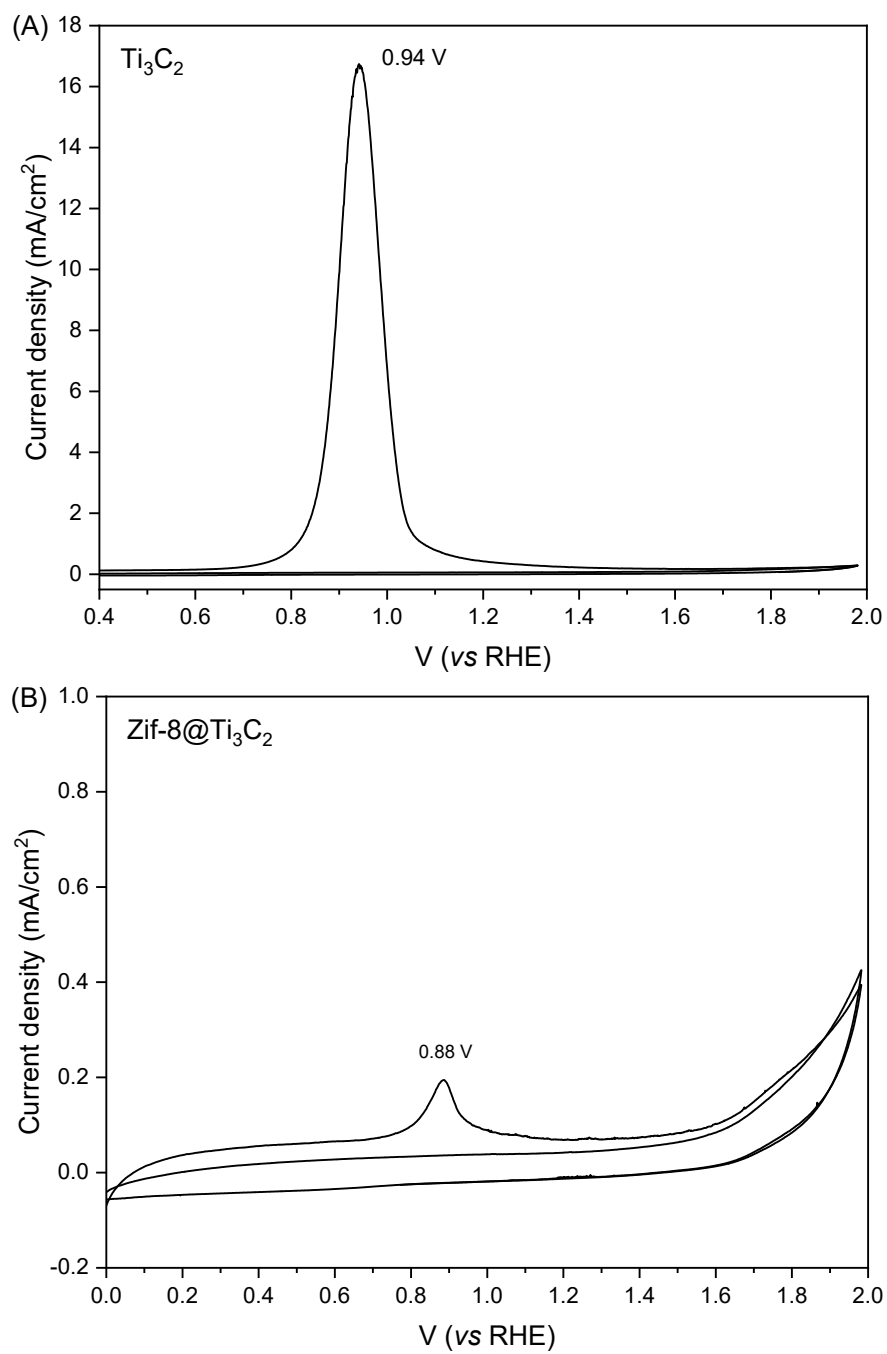

**Figure S3.** Cyclic voltammograms of  $\text{Ti}_3\text{C}_2$  and  $\text{Zif-8@Ti}_3\text{C}_2$  at high potential.

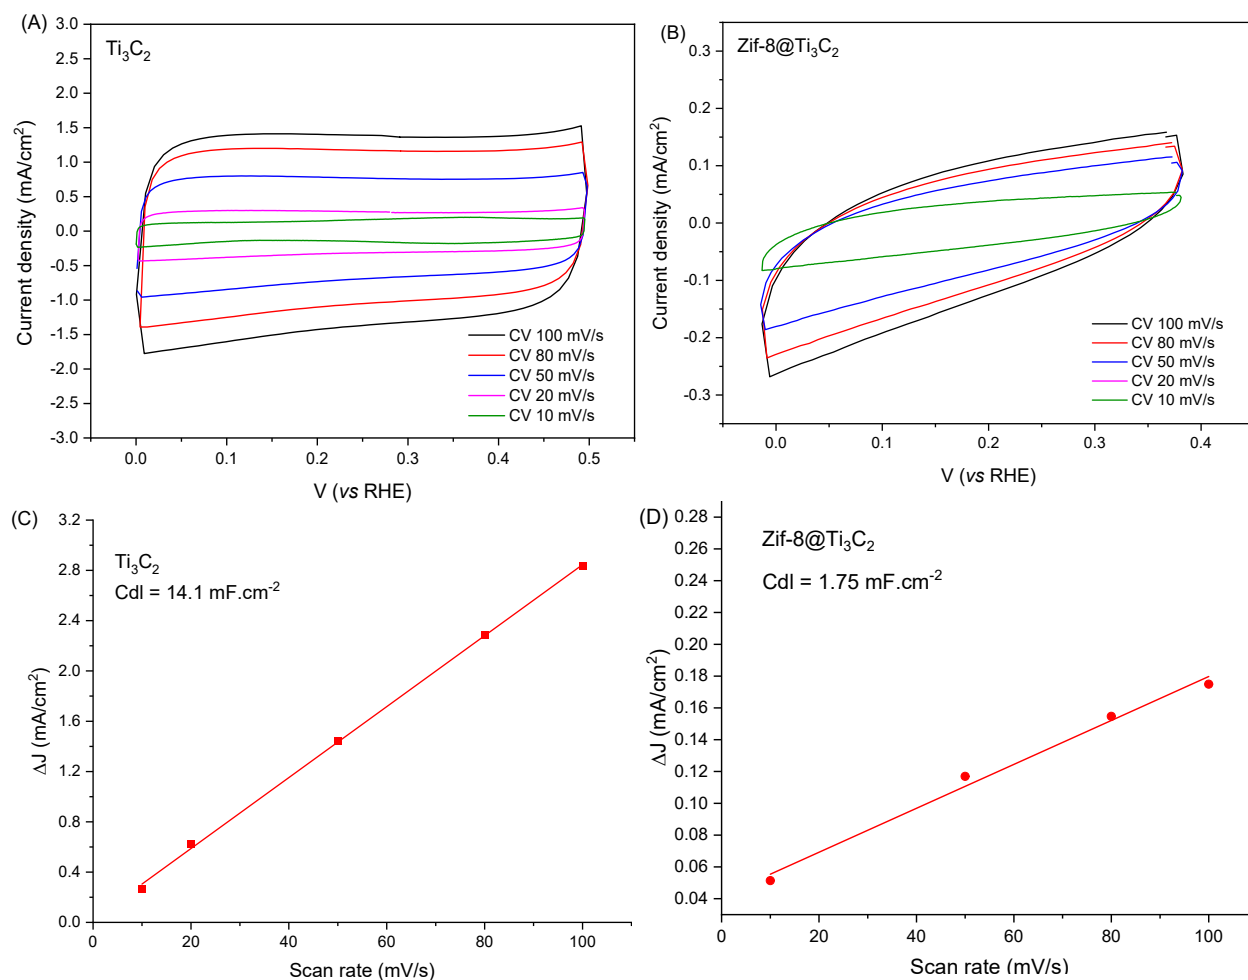

**Figure S4.** Cyclic voltammogram curves obtained in 0.1 M NaOH of (A)  $\text{Ti}_3\text{C}_2$  and (B)  $\text{Zif-8@Ti}_3\text{C}_2$  catalysts at different scan rates; Evolution of  $\Delta j$  vs. scan rate for Cdl estimation of (C)  $\text{Ti}_3\text{C}_2$  and (D)  $\text{Zif-8@Ti}_3\text{C}_2$  catalysts.

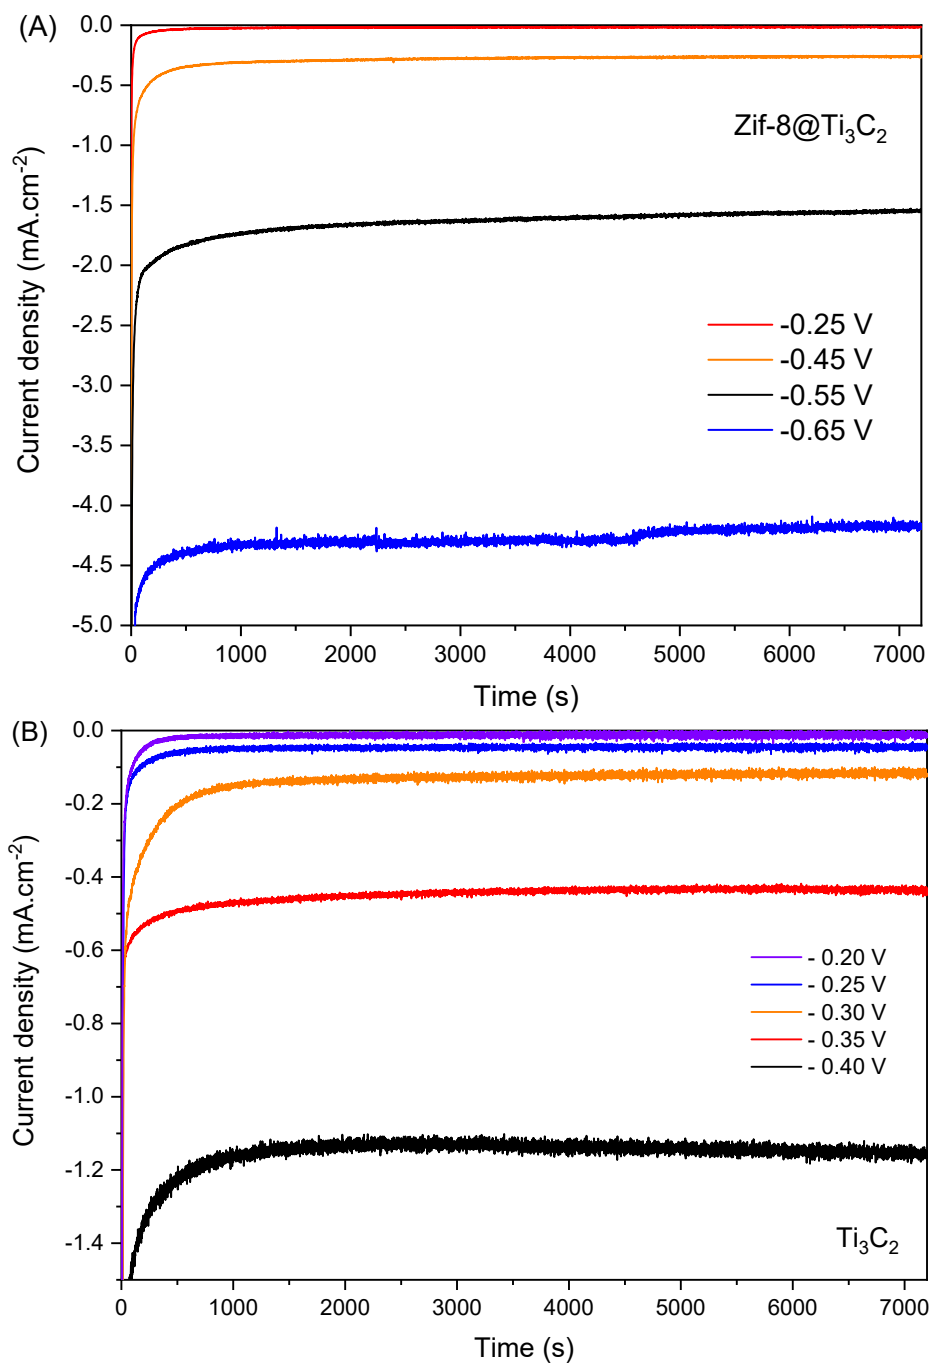

**Figure S5.** Chronoamperometry curves for electrolysis at different cathode potentials for Zif-8@Ti<sub>3</sub>C<sub>2</sub> (A) and for Ti<sub>3</sub>C<sub>2</sub> (B) catalysts.

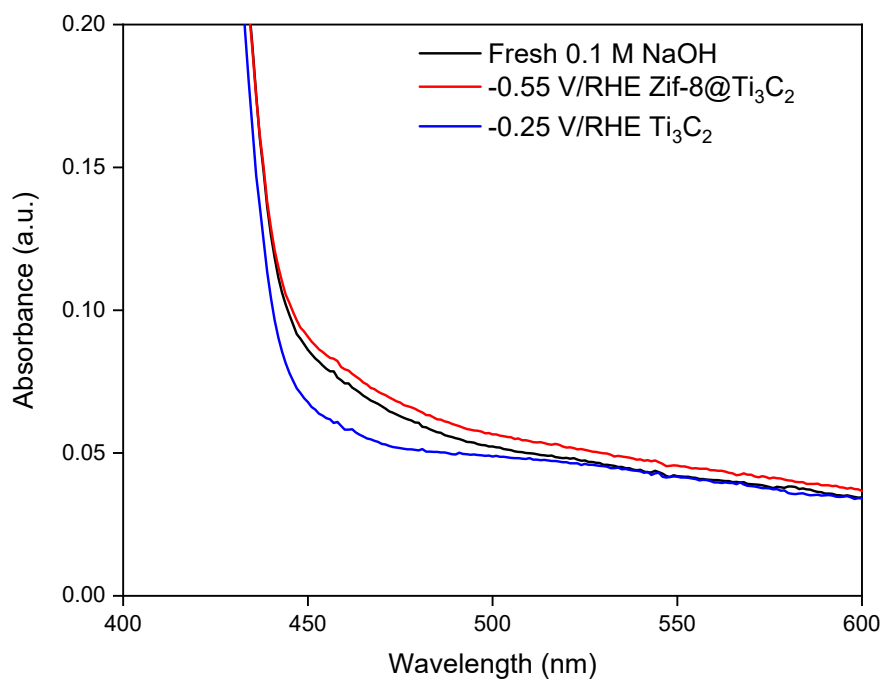

**Figure S6.** (A) Determination of hydrazine by UV-VIS analysis of electrolyte after 2 h of reaction at optimized potentials for Zif-8@Ti<sub>3</sub>C<sub>2</sub> and Ti<sub>3</sub>C<sub>2</sub> electrocatalysts in comparison to fresh 0.1 M NaOH.

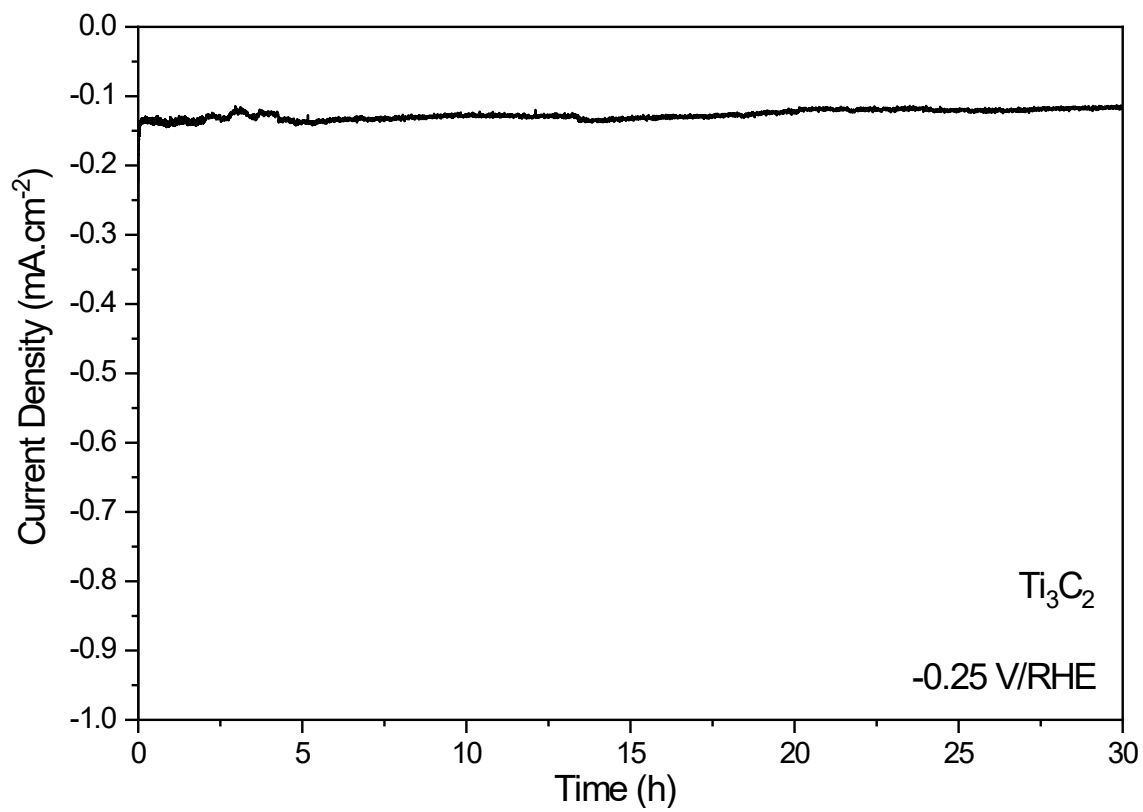

**Figure S7.** Chronoamperometric analysis of  $\text{Ti}_3\text{C}_2$  at  $-0.25\text{ V}$  vs RHE during 30h.

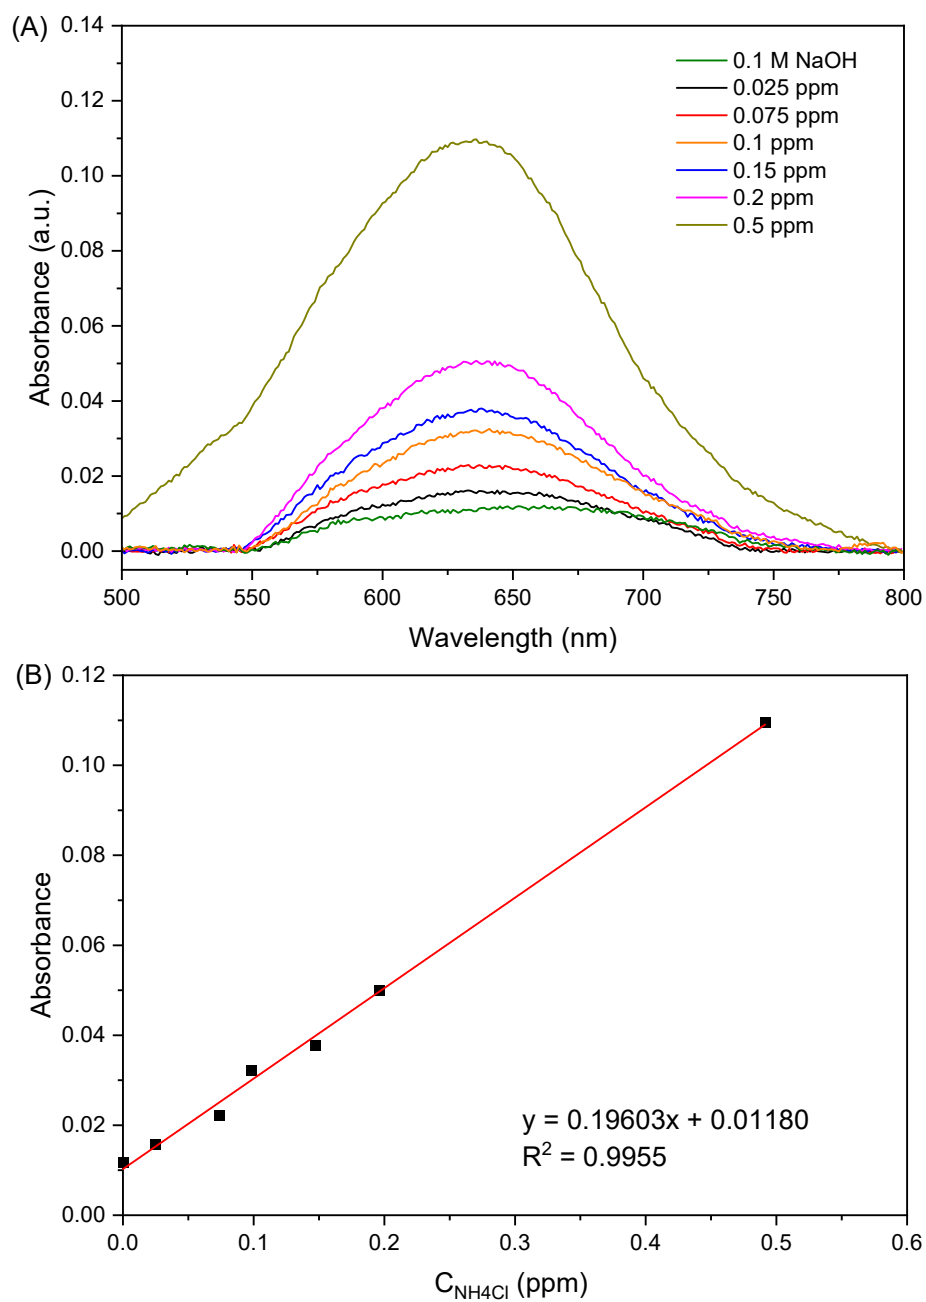

**Figure S8.** (A) UV-VIS spectra of standard samples at different concentrations of  $\text{NH}_4\text{Cl}$ . (B) Linear fitting for the absorbance vs.  $\text{NH}_4\text{Cl}$  concentration.

## References

- (1) Benchakar, M.; Loupiau, L.; Garnero, C.; Bilyk, T.; Morais, C.; Canaff, C.; Guignard, N.; Morisset, S.; Pazniak, H.; Hurand, S.; Chartier, P.; Pacaud, J.; Mauchamp, V.; Barsoum, M. W.; Habrioux, A.; Célérier, S. One MAX Phase, Different MXenes: A Guideline to Understand the Crucial Role of Etching Conditions on Ti<sub>3</sub>C<sub>2</sub>T<sub>x</sub> Surface Chemistry. *Appl. Surf. Sci.* **2020**, *530*, 147209. <https://doi.org/10.1016/j.apsusc.2020.147209>.
- (2) Watt, G. W.; Chrisp, J. D. Spectrophotometric Method for Determination of Hydrazine. *Anal. Chem.* **1952**, *24* (12), 2006–2008. <https://doi.org/10.1021/ac60072a044>.
